# Supplementary material for: Multi-Pathway Cellular Analysis on Crude Natural Drugs/Herbs from Japanese Kampo Formulations
Source: PLoS One. 2015 Jun 2;10(6):e0128872. doi: 10.1371/journal.pone.0128872 (PMC4452735; doi:10.1371/journal.pone.0128872)
Supplement: S1 Table — (XLSX) [file pone.0128872.s001.xlsx]

## Sheet: Sheet1
Supplementary Table 1. The list of crude drugs/herbs
English	Japanese	Latin	website address from INM
Achyranthes Root	Goshitsu	Achyranthis Radix	http://dentomed.u-toyama.ac.jp/en/scientific_information_on_crude_drugs/Achyranthes%20Root/SCC000025
Aconite, Common Monkshood Dauguter Root	Hobushi	Aconiti Tuber, Radix Aconiti Lateralis Preparata	http://dentomed.u-toyama.ac.jp/en/scientific_information_on_crude_drugs/Saposhnikovia%20Root%20and%20Rhizome/SCC000074
Alisma Rhizome	Takusha	Alismatis Rhizoma	http://dentomed.u-toyama.ac.jp/en/scientific_information_on_crude_drugs/Alisma%20Rhizome/SCC000052
Alpinia Officinarum Rhizome	Ryokyo	Alpiniae Officinarum Rhizoma	http://dentomed.u-toyama.ac.jp/en/scientific_information_on_crude_drugs/Alpinia%20Officinarum%20Rhizome/SCC000119
Anemarrhena Rhizome	Chimo	Anemarrhenae Rhizoma	http://dentomed.u-toyama.ac.jp/en/scientific_information_on_crude_drugs/Anemarrhena%20Rhizome/SCC000054
Angelica Dahurica Root	Byakushi	Angelicae Dahuricae Radix	http://dentomed.u-toyama.ac.jp/en/scientific_information_on_crude_drugs/Angelica%20Dahurica%20Root/SCC000068
Apricot Kernel	Kyonin	Armeniacae Semen	http://dentomed.u-toyama.ac.jp/en/scientific_information_on_crude_drugs/Apricot%20Kernel/SCC000018
Aralia Root	Dokukatsu	Araliae Cordatae Rhizoma	http://dentomed.u-toyama.ac.jp/en/scientific_information_on_crude_drugs/Araria%20Root/SCC000104
Areca	Binroji	Arecae Semen	http://dentomed.u-toyama.ac.jp/en/scientific_information_on_crude_drugs/Areca/SCC000070
Artemisia Capillaris Flower	Inchinko	Artemisiae Capillaris Flos	http://dentomed.u-toyama.ac.jp/en/scientific_information_on_crude_drugs/Artemisia%20Capillaris%20Flower/SCC000001
Artemisia Leaf	Gaiyo	Artemisiae Folium	http://dentomed.u-toyama.ac.jp/en/scientific_information_on_crude_drugs/Artemisia%20Leaf/SCC000083
Asiasarum Root	Saishin	Asiasari Radix	http://dentomed.u-toyama.ac.jp/en/scientific_information_on_crude_drugs/Asiasarum%20Root/SCC000030
Asparagus Tuber	Temmondo	Asparagi Tuber	http://dentomed.u-toyama.ac.jp/en/scientific_information_on_crude_drugs/Asparagus%20Tuber/SCC000060
Astragalus Root	Ogi	Astragali Radix	http://dentomed.u-toyama.ac.jp/en/scientific_information_on_crude_drugs/Astragalus%20Root/SCC000004
Atractylodes Lancea Rhizome	Sojutsu	Atractylodis Lanceae Rhizoma	http://dentomed.u-toyama.ac.jp/en/scientific_information_on_crude_drugs/Atractylodes%20Lancea%20Rhizome/SCC000047
Atractylodes Rhizome	Byakujutsu	Atractylodis Rhizoma	http://dentomed.u-toyama.ac.jp/en/scientific_information_on_crude_drugs/Atractylodes%20Rhizome/SCC000069
Bitter Cardamon	Yakuchi	Alpiniae Fructus	http://dentomed.u-toyama.ac.jp/en/scientific_information_on_crude_drugs/Bitter%20Cardamon/SCC000116
Bupleurum Root	Saiko	Bupleuri Radix	http://dentomed.u-toyama.ac.jp/en/scientific_information_on_crude_drugs/Bupleurum%20Root/SCC000029
Burdock Fruit	Goboshi	Arctii Fructus	http://dentomed.u-toyama.ac.jp/en/scientific_information_on_crude_drugs/Burdock%20Fruit/SCC000027
Chrysanthemum Flower	Kikuka	Chrysanthemi Flos	http://dentomed.u-toyama.ac.jp/en/scientific_information_on_crude_drugs/Chrysanthemum%20Flower/SCC000015
Cimicifuga Rhizome	Shoma	Cimicifugae Rhizoma	http://dentomed.u-toyama.ac.jp/en/scientific_information_on_crude_drugs/Cimicifuga%20Rhizome/SCC000043
Cinnamon Bark	Keihi	Cinnamoni Cortex	http://dentomed.u-toyama.ac.jp/en/scientific_information_on_crude_drugs/Cinnamon%20Bark/SCC000021
Citrus Unshiu Peel	Chimpi	Aurantii Nobilis Pericarpium	http://dentomed.u-toyama.ac.jp/en/scientific_information_on_crude_drugs/Citrus%20Unshiu%20Peel/SCC000058
Clove	Choji	Caryophylli Flos	http://dentomed.u-toyama.ac.jp/en/scientific_information_on_crude_drugs/Clove/SCC000055
Cnidium Rhizome	Senkyu	Cnidii Rhizoma	http://dentomed.u-toyama.ac.jp/en/scientific_information_on_crude_drugs/Cnidium%20Rhizome/SCC000046
Codonopsis Root	Tojin	Codonopsitis Radix	http://dentomed.u-toyama.ac.jp/en/scientific_information_on_crude_drugs/Codonopsis%20Root/SCC000103
Coix Seed	Yokuinin	Coicis Semen	http://dentomed.u-toyama.ac.jp/en/scientific_information_on_crude_drugs/Coix%20Seed/SCC000078
Coptis Rhizome	Oren	Coptidis Rhizoma	http://dentomed.u-toyama.ac.jp/en/scientific_information_on_crude_drugs/Coptis%20Rhizome/SCC000007
Cornus Fruit	Sanshuyu	Corni Fructus	http://dentomed.u-toyama.ac.jp/en/scientific_information_on_crude_drugs/Cornus%20Fruit/SCC000033
Corydalis Tuber	Engosaku	Corydalis Tuber	http://dentomed.u-toyama.ac.jp/en/scientific_information_on_crude_drugs/Corydalis%20Tuber/SCC000003
Cyperus Rhizome	Kobushi	Cyperi Rhizoma	http://dentomed.u-toyama.ac.jp/en/scientific_information_on_crude_drugs/Cyprus%20Rhizome/SCC000023
Danshen Root	Tanjin	Salviae Miltiorhizae Radix	http://dentomed.u-toyama.ac.jp/en/scientific_information_on_crude_drugs/Danshen%20Root/SCC000102
Densefruit Pittany Root-bark	Hakusempi	Dictamni Radicis Cortex	http://dentomed.u-toyama.ac.jp/en/scientific_information_on_crude_drugs/Densefruit%20Pittany%20Root-bark/SCC000108
Desertliving Cistanche	Nikujuyo	Cistanchis Herba	http://dentomed.u-toyama.ac.jp/en/scientific_information_on_crude_drugs/Desertliving%20Cistanche/SCC000107
Eleutherococcus Senticosus Rhizome	Shigoka	Eleutherococci Senticosi Rhizoma	http://dentomed.u-toyama.ac.jp/en/scientific_information_on_crude_drugs/Eleutherococcus%20Senticosus%20Rhizome/SCC000037
Ephedra Herb	Mao	Ephedrae Herba	http://dentomed.u-toyama.ac.jp/en/scientific_information_on_crude_drugs/Ephedra%20Herb/SCC000076
Eucommia Bark	Tochu	Eucommiae Cortex	http://dentomed.u-toyama.ac.jp/en/scientific_information_on_crude_drugs/Eucommia%20Bark/SCC000105
Evodia Fruit	Goshuyu	Evodiae Fructus	http://dentomed.u-toyama.ac.jp/en/scientific_information_on_crude_drugs/Euodia%20Fruit/SCC000026
Forsythia Fruit	Rengyo	Forsythiae Fructus	http://dentomed.u-toyama.ac.jp/en/scientific_information_on_crude_drugs/Forsythia%20Fruit/SCC000080
Fritillaria Bulb	Baimo	Fritillariae Bulbus	http://dentomed.u-toyama.ac.jp/en/scientific_information_on_crude_drugs/Fritillaria%20Bulb/SCC000064
Ganoderma	Reishi	Ganoderma	http://dentomed.u-toyama.ac.jp/en/scientific_information_on_crude_drugs/Ganoderma/SCC000120
Gardenia Fruit	Sanshishi	Gardeniae Fructus	http://dentomed.u-toyama.ac.jp/en/scientific_information_on_crude_drugs/Gardenia%20Fruit/SCC000032
Gastrodia Tuber	Temma	Gastrodiae Tuber	http://dentomed.u-toyama.ac.jp/en/scientific_information_on_crude_drugs/Gastrodia%20Tuber/SCC000059
Gentiana Macrophylla Root	Jingyo	Gentianae Macrophyllae Radix	http://dentomed.u-toyama.ac.jp/en/scientific_information_on_crude_drugs/Gentiana%20Macrophylla%20Root/SCC000096
Ginger	Shokyo	Zingiberis Rhizoma	http://dentomed.u-toyama.ac.jp/en/scientific_information_on_crude_drugs/Ginger/SCC000042
Ginseng	Ninjin	Ginseng Radix	http://dentomed.u-toyama.ac.jp/en/scientific_information_on_crude_drugs/Ginseng/SCC000063
Glycyrrhiza	Kanzo	Glycyrrhizae Radix	http://dentomed.u-toyama.ac.jp/en/scientific_information_on_crude_drugs/Glycyrrhiza/SCC000013
Hemp Fruit	Mashinin	Cannabis Fructus	http://dentomed.u-toyama.ac.jp/en/scientific_information_on_crude_drugs/Hemp%20Fruit/SCC000077
Himalayan Teasel Root	Zokudan	Dipsaci Radix	http://dentomed.u-toyama.ac.jp/en/scientific_information_on_crude_drugs/Himalayan%20Teasel%20Root/SCC000101
Immature Orange	Kijitsu	Auranti Fructus Immaturus	http://dentomed.u-toyama.ac.jp/en/scientific_information_on_crude_drugs/Immature%20Orange/SCC000016
Imperata Rhizome	Bokon	Imperatae Rhizoma	http://dentomed.u-toyama.ac.jp/en/scientific_information_on_crude_drugs/Imperata%20Rhizome/SCC000111
Japanese Angelica Root	Toki	Angelicae Radix	http://dentomed.u-toyama.ac.jp/en/scientific_information_on_crude_drugs/Japanese%20Angelica%20Root/SCC000061
Japanese Gentian	Ryutan	Gentianae Scabrae Radix	http://dentomed.u-toyama.ac.jp/en/scientific_information_on_crude_drugs/Japanese%20Gentian/SCC000079
Jujube	Taiso	Zizyphi Fructus	http://dentomed.u-toyama.ac.jp/en/scientific_information_on_crude_drugs/Jujube/SCC000051
Jujube / Zizyphus Seed	Sansonin	Zizyphi Spinosi Semen	http://dentomed.u-toyama.ac.jp/en/scientific_information_on_crude_drugs/Jujube%20Seed/SCC000035
Leonurus Herb	Yakumoso	Leonuri Herba	http://dentomed.u-toyama.ac.jp/en/scientific_information_on_crude_drugs/Leonurus%20Herb/SCC000117
Lindera Root	Uyaku	Linderae Radix	http://dentomed.u-toyama.ac.jp/en/scientific_information_on_crude_drugs/Lindera%20Root/SCC000082
Loquat Leaf	Biwayo	Eriobotryae Folium	http://dentomed.u-toyama.ac.jp/en/scientific_information_on_crude_drugs/Loquat%20Leaf/SCC000110
Lycium Bark	Jikoppi	Lycii Cortex	http://dentomed.u-toyama.ac.jp/en/scientific_information_on_crude_drugs/Lycium%20Bark/SCC000038
Magnolia Bark	Koboku	Magnoliae Cortex	http://dentomed.u-toyama.ac.jp/en/scientific_information_on_crude_drugs/Magnolia%20Bark/SCC000024
Magnolia Flower	Shin'i	Magnoliae Flos	http://dentomed.u-toyama.ac.jp/en/scientific_information_on_crude_drugs/Magnolia%20Flower/SCC000044
Malaytea Scurfpea Fruit	Hokotsushi	Psoraleae Semen	http://dentomed.u-toyama.ac.jp/en/scientific_information_on_crude_drugs/Malaytea%20Scurfpea%20Fruit/SCC000112
Mentha Herb	Hakka	Menthae Herba	http://dentomed.u-toyama.ac.jp/en/scientific_information_on_crude_drugs/Mentha%20Herb/SCC000066
Moutan Bark	Botampi	Moutan Cortex	http://dentomed.u-toyama.ac.jp/en/scientific_information_on_crude_drugs/Moutan%20Bark/SCC000075
Mulberry Bark	Sohakuhi	Mori Cortex	http://dentomed.u-toyama.ac.jp/en/scientific_information_on_crude_drugs/Mulberry%20Bark/SCC000048
Mulberry Leaf	Souyo	Mori Folium	http://dentomed.u-toyama.ac.jp/en/scientific_information_on_crude_drugs/Mulberry%20Leaf/SCC000100
Myrrha	Motsuyaku	Myrrha	http://dentomed.u-toyama.ac.jp/en/scientific_information_on_crude_drugs/Myrrha/SCC000115
Notoginseng Root	Sanshichininjin	Notoginseng Radix	http://dentomed.u-toyama.ac.jp/en/scientific_information_on_crude_drugs/Notoginseng%20Root/SCC000092
Notopterigum	Kyokatsu	Notopterygii Rhizoma	http://dentomed.u-toyama.ac.jp/en/scientific_information_on_crude_drugs/Notopterygium/SCC000017
Ophiopogon Tuber	Bakumondo	Ophiopogonis Tuber	http://dentomed.u-toyama.ac.jp/en/scientific_information_on_crude_drugs/Ophiopogon%20Tuber/SCC000065
Panax Rhizome	Chikusetsuninjin	Panacis Japonici Rhizoma	http://dentomed.u-toyama.ac.jp/en/scientific_information_on_crude_drugs/Panax%20Japonicus%20Rhizome/SCC000053
Peach Kernel	Tonin	Persicae Semen	http://dentomed.u-toyama.ac.jp/en/scientific_information_on_crude_drugs/Peach%20Kernel/SCC000062
Peony Root	Shakuyaku	Paeoniae Radix	http://dentomed.u-toyama.ac.jp/en/scientific_information_on_crude_drugs/Peony%20Root/SCC000040
Perilla Herb	Soyo	Perillae Herba	http://dentomed.u-toyama.ac.jp/en/scientific_information_on_crude_drugs/Perilla%20Herb/SCC000049
Phellodendron Bark	Obaku	Phellodendri Cortex	http://dentomed.u-toyama.ac.jp/en/scientific_information_on_crude_drugs/Phellodendron%20Bark/SCC000006
Pinellia Tuber	Hange	Pinelliae Tuber	http://dentomed.u-toyama.ac.jp/en/scientific_information_on_crude_drugs/Pinellia%20Tuber/SCC000067
Plantago Seed	Shazenshi	Plantaginis Semen	http://dentomed.u-toyama.ac.jp/en/scientific_information_on_crude_drugs/Plantago%20Seed/SCC000041
Platycodon Root	Kikyo	Platycodi Radix	http://dentomed.u-toyama.ac.jp/en/scientific_information_on_crude_drugs/Platycodon%20Root/SCC000014
Polygala Root	Onji	Polygalae Radix	http://dentomed.u-toyama.ac.jp/en/scientific_information_on_crude_drugs/Polygala%20Root/SCC000008
Polygonum Root	Kashuu	Polygoni Multiflori Radix	http://dentomed.u-toyama.ac.jp/en/scientific_information_on_crude_drugs/Polygonum%20Root/SCC000084
Polyporus Sclerotium	Chorei	Polyporus	http://dentomed.u-toyama.ac.jp/en/scientific_information_on_crude_drugs/Polyporus%20Sclerotium/SCC000057
Poria Sclerotium	Bukuryo	Poria	http://dentomed.u-toyama.ac.jp/en/scientific_information_on_crude_drugs/Poria%20Sclerotium/SCC000071
Prepared Rehmannia Root	Jukujio	Processi Rehmanniae Radix	http://dentomed.u-toyama.ac.jp/en/scientific_information_on_crude_drugs/Processed%20Rehmannia%20Root/SCC000039
Processed Ginger	Kankyo	Zingiberis Processum Rhizoma	http://dentomed.u-toyama.ac.jp/en/scientific_information_on_crude_drugs/Processed%20Ginger/SCC000012
Pueraria Root	Kakkon	Puerariae Radix	http://dentomed.u-toyama.ac.jp/en/scientific_information_on_crude_drugs/Pueraria%20Root/SCC000010
Red Ginseng	Kojin	Ginseng Radix Rubra	http://dentomed.u-toyama.ac.jp/en/scientific_information_on_crude_drugs/Red%20Ginseng/SCC000022
Red Paeony Root	Sekishaku	Paeoniae Radix Rubra	http://dentomed.u-toyama.ac.jp/en/scientific_information_on_crude_drugs/Red%20Peony%20Root/SCC000045
Rehmannia Root	Jio	Rehmanniae Radix	http://dentomed.u-toyama.ac.jp/en/scientific_information_on_crude_drugs/Rehmannia%20Root/SCC000036
Rhubarb	Daio	Rhei Rhizoma	http://dentomed.u-toyama.ac.jp/en/scientific_information_on_crude_drugs/Rhubarb/SCC000050
Safflower	Koka	Garthami Flos	http://dentomed.u-toyama.ac.jp/en/scientific_information_on_crude_drugs/Safflower/SCC000087
Saffron	Safuran	Crocus	http://dentomed.u-toyama.ac.jp/en/scientific_information_on_crude_drugs/Saffron/SCC000031
Saposhnikovia Root	Bofu	Saposhnikoviae Radix	http://dentomed.u-toyama.ac.jp/en/scientific_information_on_crude_drugs/Saposhnikovia%20Root%20and%20Rhizome/SCC000074
Sasa Leaf	Kumazasa	Sasa Folium	http://dentomed.u-toyama.ac.jp/en/scientific_information_on_crude_drugs/Sasa%20Leaf/SCC000085
Saussurea Root	Mokko	Saussureae Radix	http://dentomed.u-toyama.ac.jp/en/scientific_information_on_crude_drugs/Saussurea%20Root/SCC000114
Schisandra Fruit	Gomishi	Schisandrae Fructus	http://dentomed.u-toyama.ac.jp/en/scientific_information_on_crude_drugs/Schisandra%20Fruit/SCC000028
Schizonepeta Spike	Keigai	Schizonepetae Spica	http://dentomed.u-toyama.ac.jp/en/scientific_information_on_crude_drugs/Schizonepeta%20Spike/SCC000020
Scutellaria Root	Ogon	Scutellariae Radix	http://dentomed.u-toyama.ac.jp/en/scientific_information_on_crude_drugs/Scutellaria%20Root/SCC000005
Sesame	Goma	Sesami Semen	http://dentomed.u-toyama.ac.jp/en/scientific_information_on_crude_drugs/Sesame/SCC000091
Shrub Chaste Tree Fruit	Mankeishi	Viticis Fructus	http://dentomed.u-toyama.ac.jp/en/scientific_information_on_crude_drugs/Shrub%20Chaste%20Tree%20Fruit/SCC000113
Silktree Albizia Bark	Gokanhi	Albizziae Cortex	http://dentomed.u-toyama.ac.jp/en/scientific_information_on_crude_drugs/Silktree%20Albizia%20Bark/SCC000088
Sinomenium Stem	Boi	Sinomeni Caulis Et Rhizoma	http://dentomed.u-toyama.ac.jp/en/scientific_information_on_crude_drugs/Sinomenium%20Stem%20and%20Rhizome/SCC000073
Smilax Rhizome	Sankirai	Smilacis Rhizoma	http://dentomed.u-toyama.ac.jp/en/scientific_information_on_crude_drugs/Smilax%20Rhizome/SCC000171
Sophora Root	Kujin	Sophorae Radix	http://dentomed.u-toyama.ac.jp/en/scientific_information_on_crude_drugs/Sophora%20Root/SCC000019
Sparganium Rhizome	Sanryo	Sparganii Rhizoma	http://dentomed.u-toyama.ac.jp/en/scientific_information_on_crude_drugs/Sparganium%20Rhizome/SCC000093
Suberect Spatholobus Stem	Keiketto	Spatholobi Caulis; Mucunae Caulis	http://dentomed.u-toyama.ac.jp/en/scientific_information_on_crude_drugs/Suberect%20Spatholobus%20Stem/SCC000086
Swertia Herb	Senburi	Swertiae Herba	http://dentomed.u-toyama.ac.jp/en/scientific_information_on_crude_drugs/Swertia%20Herb/SCC000099
Tribulus Fruit	Shitsurishi	Tribuli Fructus	http://dentomed.u-toyama.ac.jp/en/scientific_information_on_crude_drugs/Tribulus%20Fruit/SCC000094
Trichosanthes Root	Karokon	Trichosanthis Radix	http://dentomed.u-toyama.ac.jp/en/scientific_information_on_crude_drugs/Trichosanthes%20Root/SCC000011
Turmeric	Ukon	Curcumae Rhizoma	http://dentomed.u-toyama.ac.jp/en/scientific_information_on_crude_drugs/Turmeric/SCC000002
Uncaria Hook	Chotoko	Uncariae Uncis cum Ramulus	http://dentomed.u-toyama.ac.jp/en/scientific_information_on_crude_drugs/Uncaria%20Hook/SCC000056
Zanthoxylum Fruit	Sansho	Zanthoxyli Fructus	http://dentomed.u-toyama.ac.jp/en/scientific_information_on_crude_drugs/Zanthoxyrum%20Fruit/SCC000034
Zedoary	Gajutsu	Zedoariae Rhizoma	http://dentomed.u-toyama.ac.jp/en/scientific_information_on_crude_drugs/Zedoary/SCC000009
